# Supplementary material for: Controlled synthesis of cobalt carbonate/graphene composites with excellent supercapacitive performance and pseudocapacitive characteristics
Source: Royal Society of Chemistry journal article supplement (doi:10.1039/c5ta02916c), 2015-01-01
Supplement: c5ta02916c1.pdf [file c5ta02916c1.pdf]

Electronic Supplementary Information

**Controlled synthesis of cobalt carbonate/graphene composites with excellent supercapacitive performance and pseudocapacitive characteristics**

Mohammad Akbari Garakani<sup>a</sup>, Sara Abouali<sup>a</sup>, Biao Zhang<sup>a</sup>, Zheng-Long Xu<sup>a</sup>, Jiaqiang Huang<sup>a</sup>, Jian-Qiu Huang<sup>a</sup>, Elham Kamali Heidari<sup>a</sup>, Jang-Kyo Kim<sup>a\*</sup>

<sup>a</sup> Department of Mechanical and Aerospace Engineering, The Hong Kong University of Science and Technology, Clear Water Bay, Kowloon, Hong Kong

\*Email: [mejkkim@ust.hk](mailto:mejkkim@ust.hk)

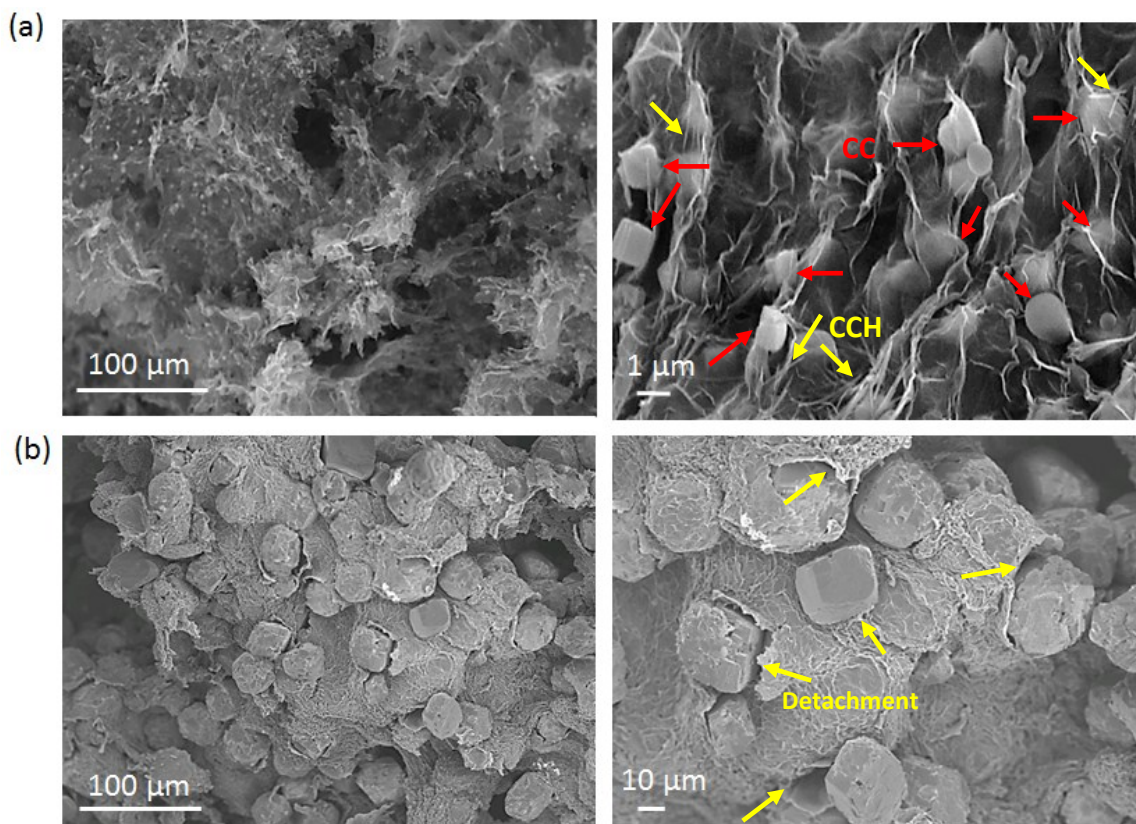

**Fig. S1** SEM images of (a) CC/GA-1 and (b) CC/GA-3 composites.

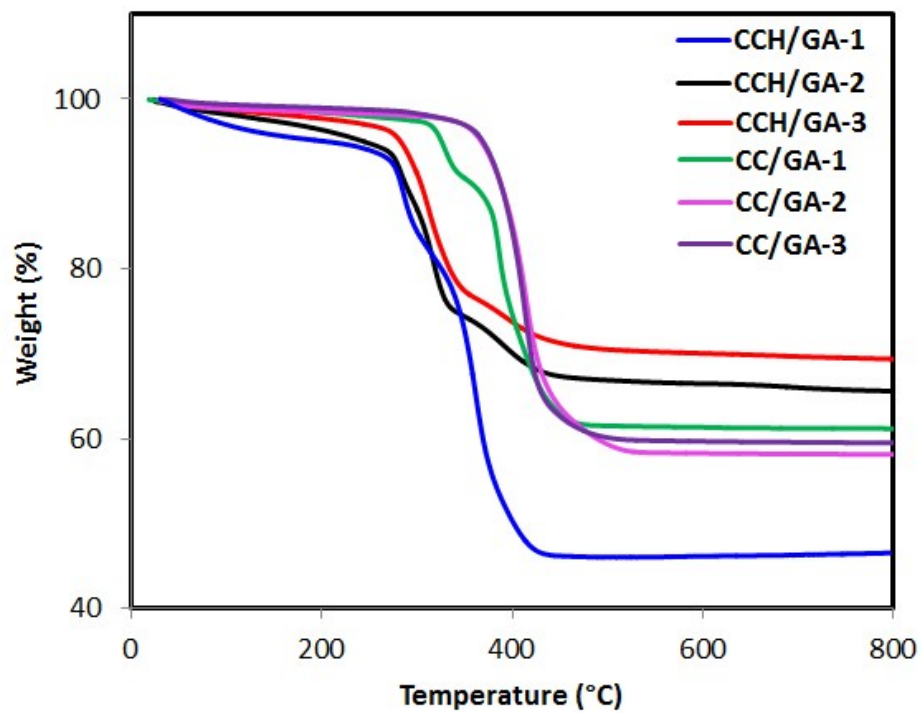

**Fig. S2** TGA result of all composites.

**Table S1.** Impedance parameters of the electrodes calculated from the equivalent circuit.

| Electrode | $R_s/\Omega$ | $R_{ct}/\Omega$ |
|-----------|--------------|-----------------|
| CCH/GA-0  | 0.68         | 0.195           |
| CCH/GA-2  | 0.51         | 0.07            |
| CC/GA-1   | 0.49         | 0.05            |

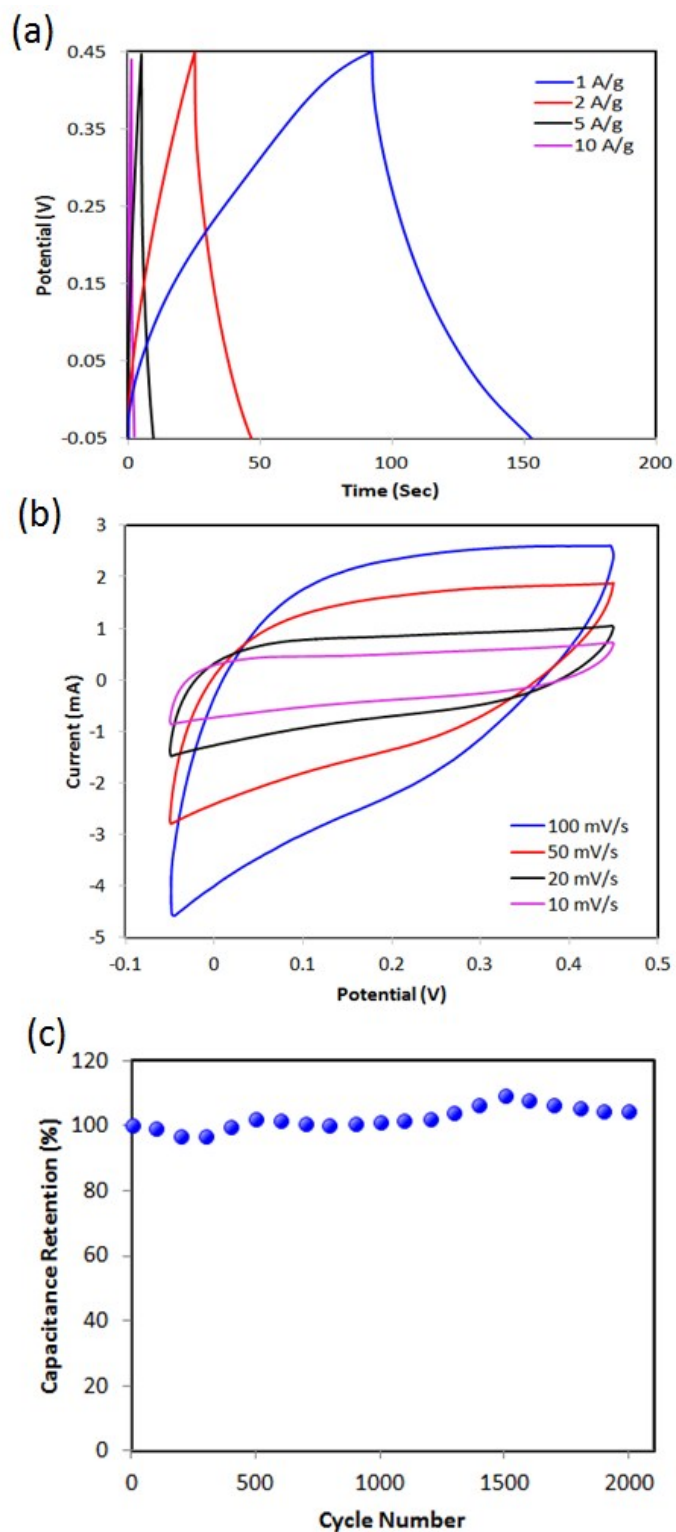

**Fig. S3** (a) Typical charge/discharge profiles at different current densities; (b) CV curves at different scan rates; and (c) cyclic stability obtained from the CV test carried out at a scan rate of  $100 \text{ mV s}^{-1}$  for the optimal composite electrode (CCH/GA-2) in two electrode system.
